# Supplementary material
Source: PubMed Central journal article supplement (PMC4067010)
Supplement: NIHMS582847-supplement-02.pdf [file NIHMS582847-supplement-02.pdf]

**Supplemental Figure 1** Quantitative RT-PCR was used to analyze gene expression patterns in SFG tissue for a subset of synaptic and mitochondrial bioenergetics genes. Multiple gene components of the mitochondrial complex NADH:ubiquinone oxidoreductase were assessed (NDUFA6, NDUFB2, NDUFB6, NDUFV2, NDUFS2) as well as 4 synapse-related genes (SNAP25, GRIA2, GRIN1, GABARB3). \*  $p < 0.05$ , \*\*  $p < 0.01$ , \*\*\*  $p < 0.005$ , \*\*\*\*  $p < 0.001$  MCI vs AD.

**Supplemental Figure 2** Strong correlations between gene expression and MMSE in MCI in the EC and HC were found for the dopaminergic neurotransmitter receptor 5 (DRD5), cell adhesion molecule 1 (CADM1), cofilin 2 (CFL2), S100B, and bridging integrator 1/amphiphysin 2 (BIN1). Significance threshold:  $p < 0.05$ .

# Supplemental Figure 1

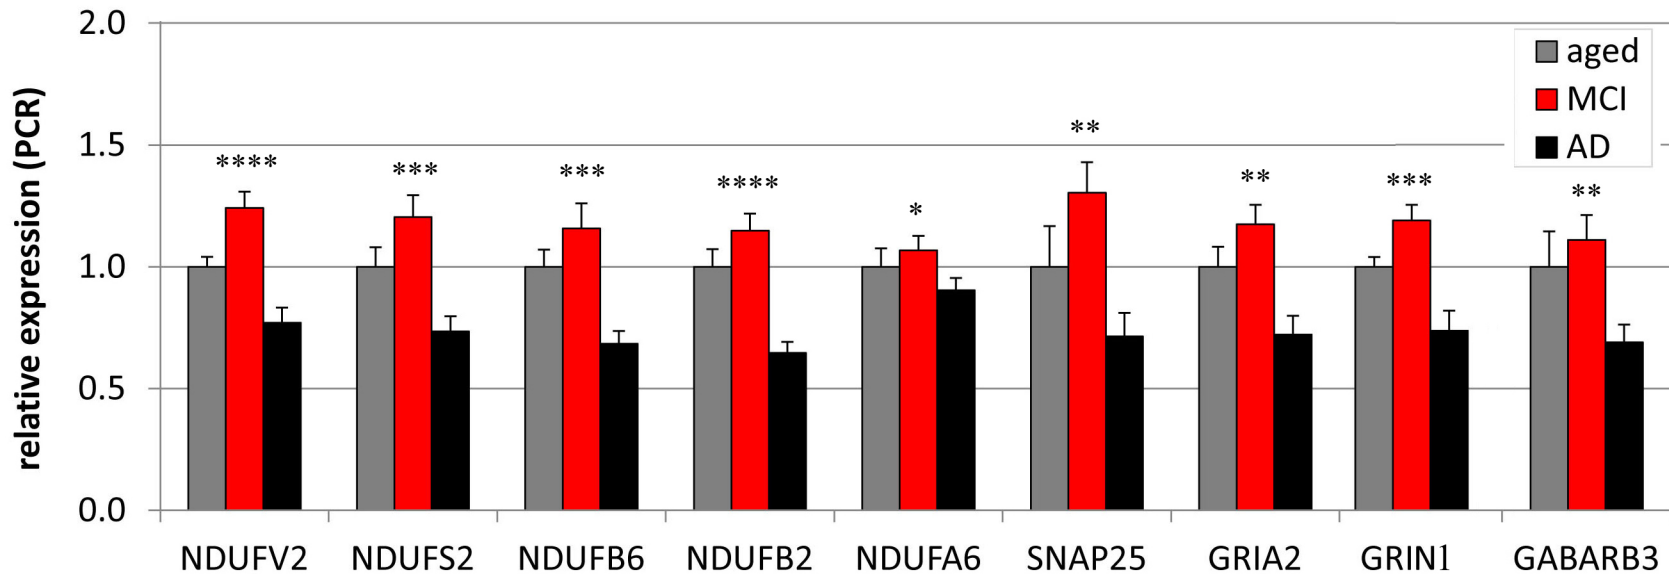

## Supplemental Figure 2

Gene Expression

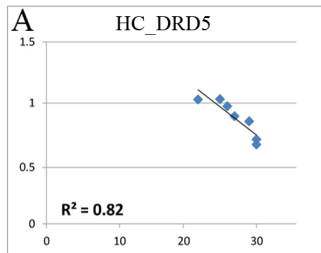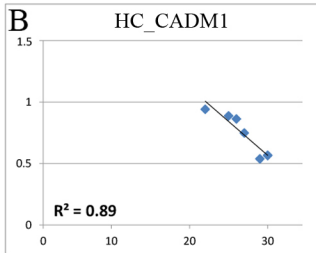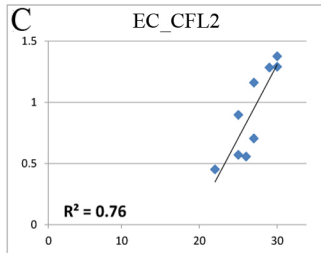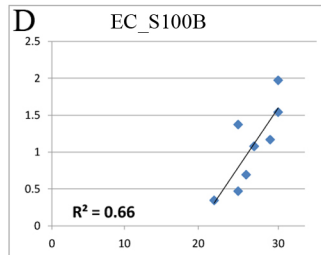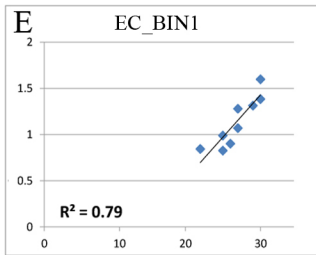

MMSE
